# Supplementary material
Source: PubMed Central journal article supplement (PMC1941789)

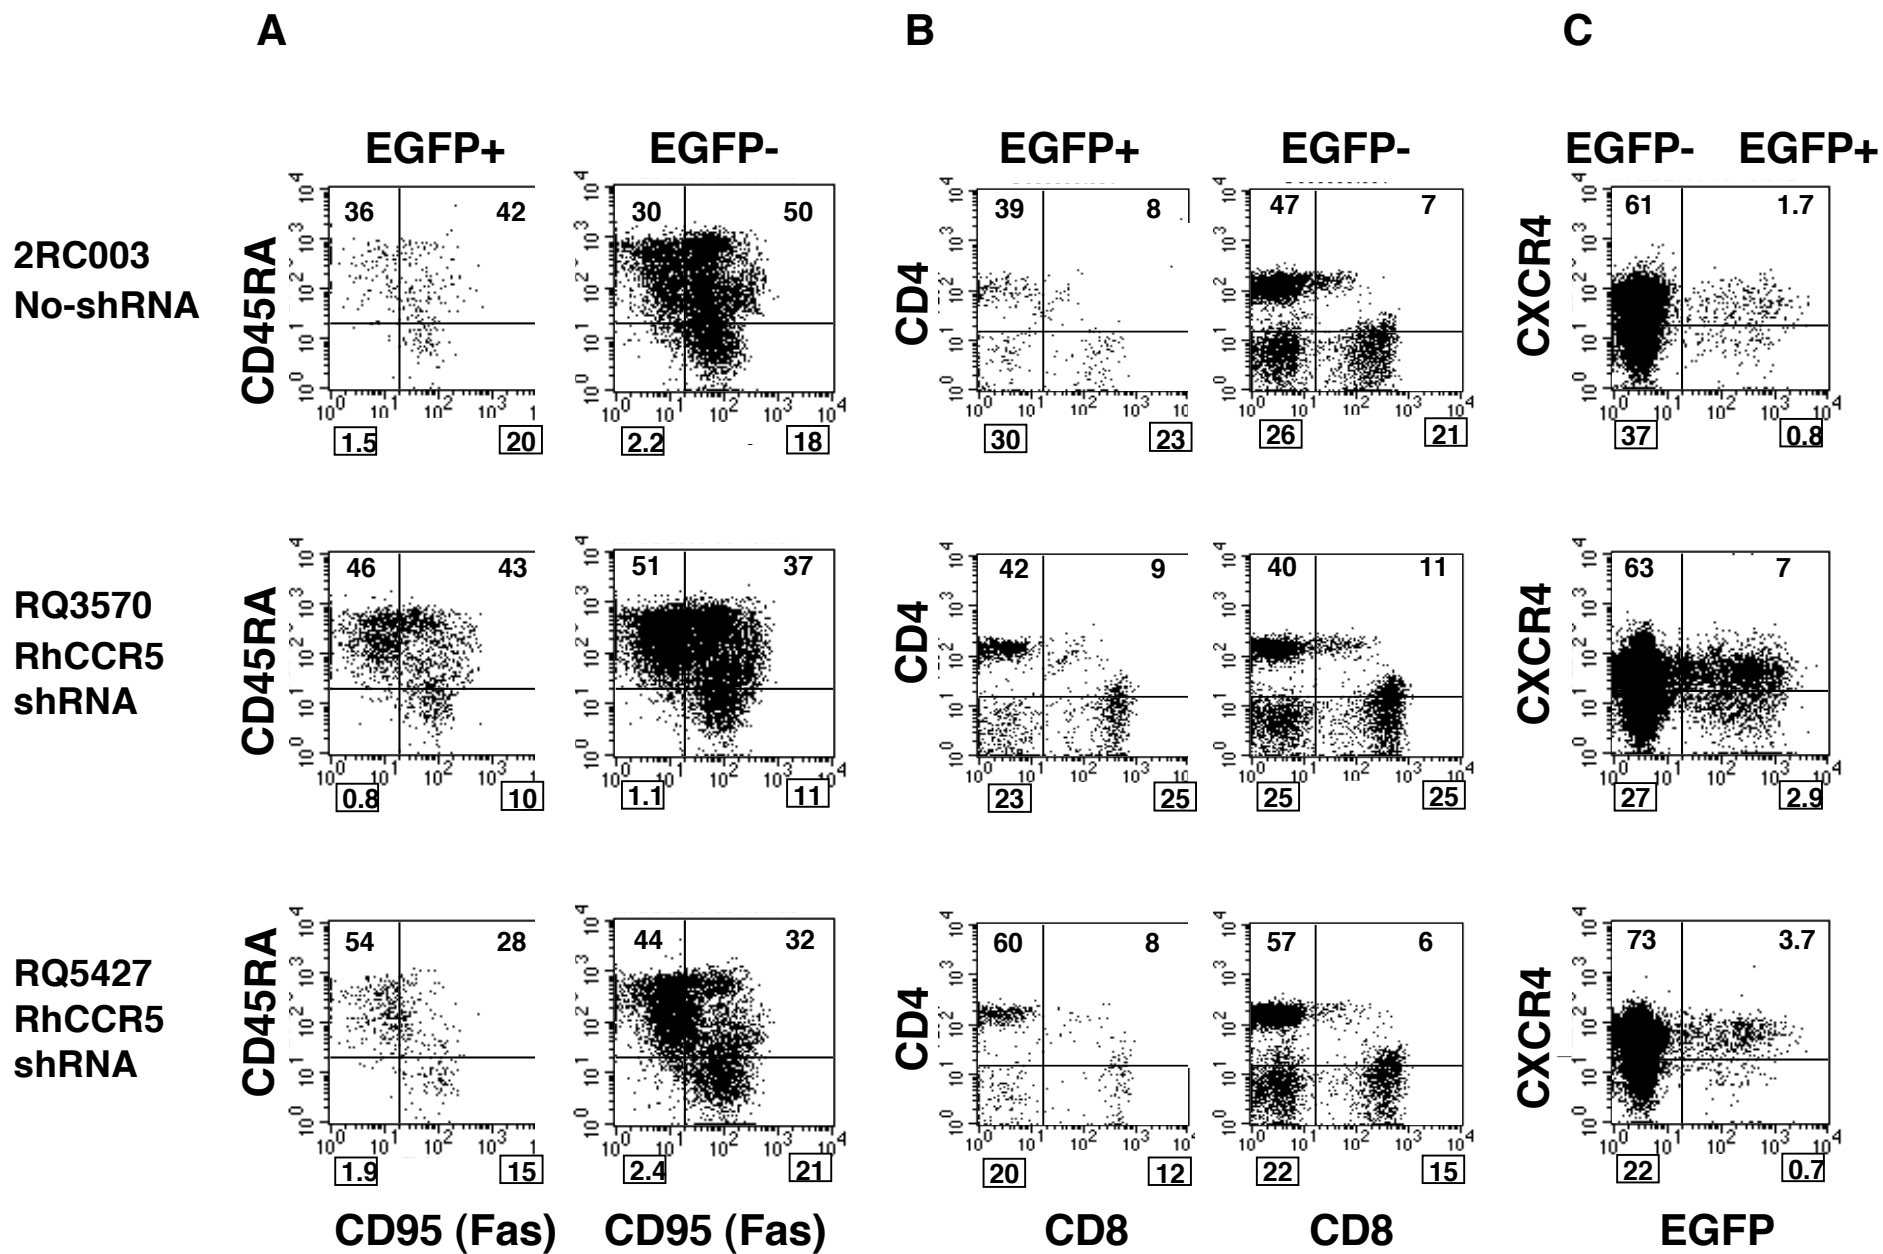

Supplement: pnas_0705474104_1.pdf [file pnas_0705474104_1.pdf]

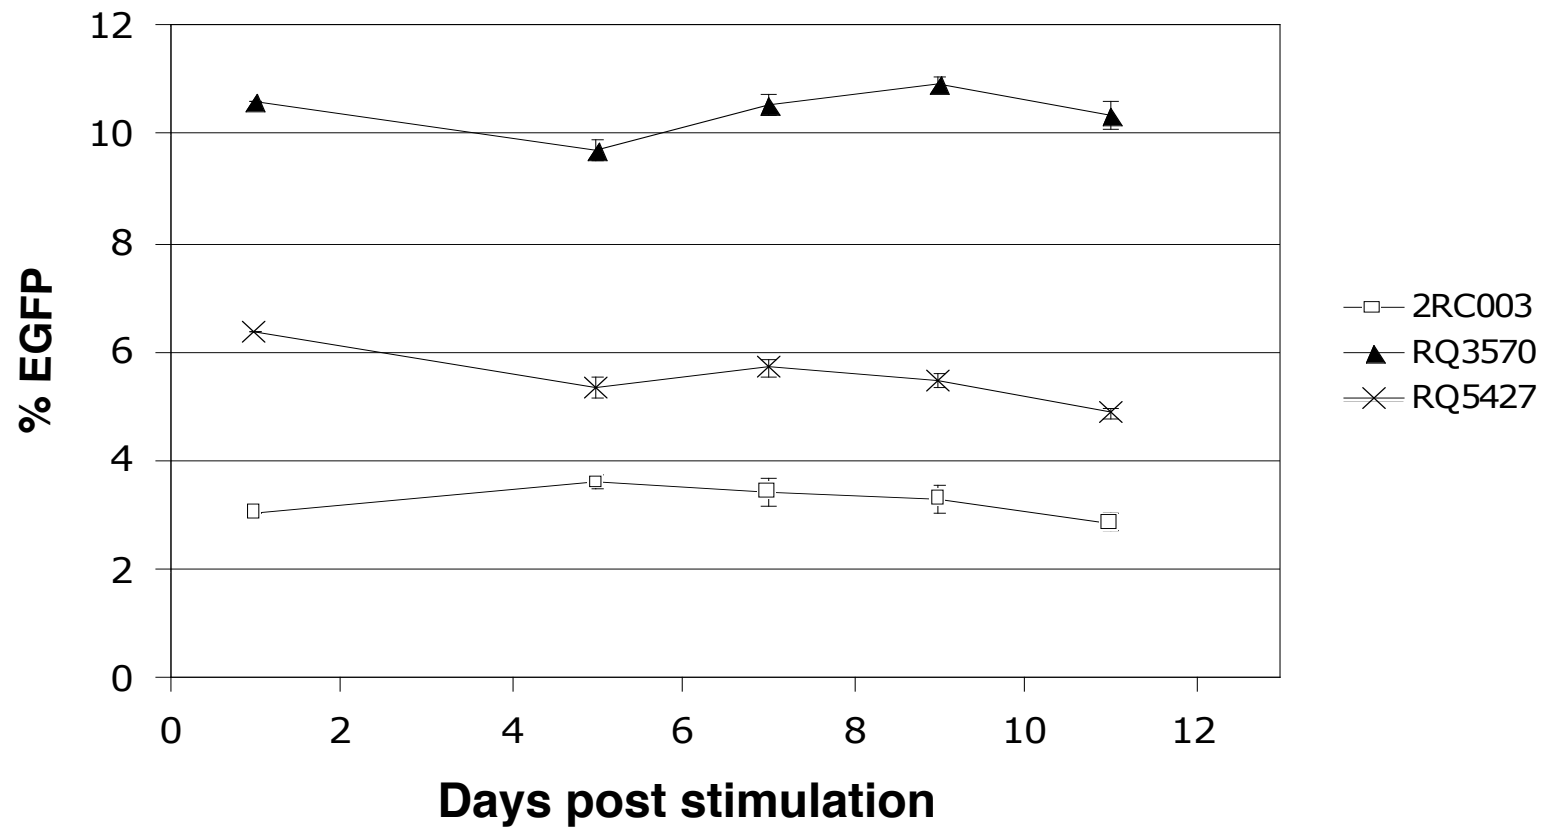

Supplement: pnas_0705474104_2.pdf [file pnas_0705474104_2.pdf]

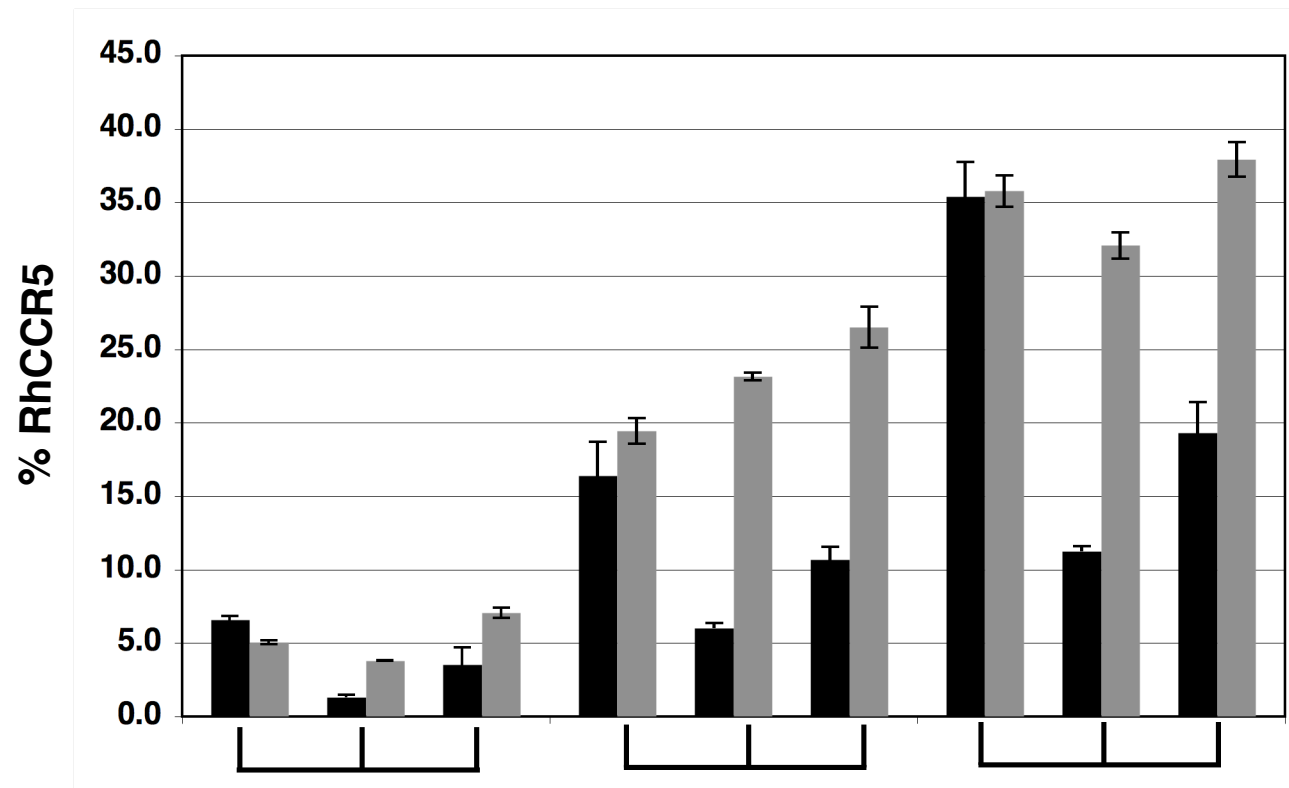

Days post stimulation

Day 7

Day 9

Day 11

2RC003

RQ3570

RQ5427

2RC003

RQ3570

RQ5427

2RC003

RQ3570

RQ5427

Supplement: pnas_0705474104_3.pdf [file pnas_0705474104_3.pdf]
